# Supplementary material for: Evaluation of Human Bone Marrow Mesenchymal Stromal Cell (MSC) Functions on a Biomorphic Rattan-Wood-Derived Scaffold: A Comparison between Cultured and Uncultured MSCs
Source: MDPI journal article supplement (doi:10.3390/bioengineering9010001), 2021-12-21
Supplement: s1 [file s1]

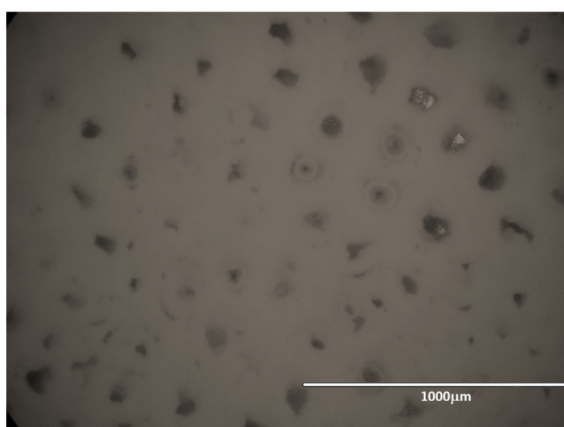

**B-HA**

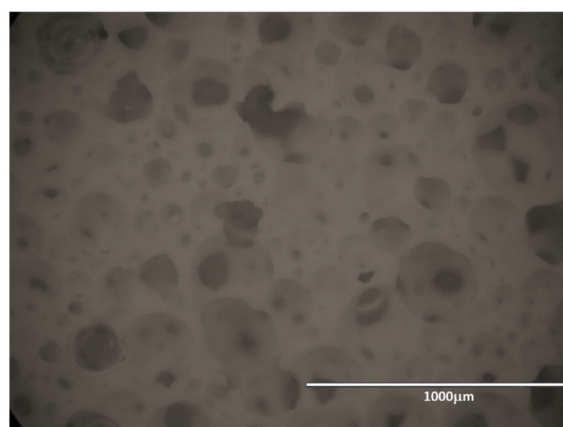

**S-HA**

**Supplementary Figure S1. Microscopic images of both scaffolds under transmitted light at 4X.**

**Supplementary Table S1. List for used genes.**

| Sr.no | Gene Abbreviation    | Function                            |
|-------|----------------------|-------------------------------------|
| 1     | <i>RUNX2</i>         | osteogenesis and bone remodeling    |
| 2     | <i>ALP</i>           |                                     |
| 3     | <i>IBSP</i>          |                                     |
| 4     | <i>COL1A1</i>        |                                     |
| 5     | <i>BGLAP</i>         |                                     |
| 6     | <i>SPP1/OPN</i>      |                                     |
| 7     | <i>SPARC</i>         |                                     |
| 8     | <i>RANKL/TNFSF11</i> |                                     |
| 9     | <i>OPG/ TNFSF11B</i> |                                     |
| 10    | <i>ANKH</i>          |                                     |
| 11    | <i>GREM1</i>         |                                     |
| 12    | <i>E11/PDPN</i>      |                                     |
| 13    | <i>BMP2</i>          |                                     |
| 14    | <i>OMD</i>           |                                     |
| 15    | <i>PTH1H</i>         | Chondrogenesis and cartilage damage |
| 16    | <i>SOX9</i>          |                                     |
| 17    | <i>COMP</i>          |                                     |
| 18    | <i>ACAN</i>          |                                     |
| 19    | <i>MMP1</i>          |                                     |
| 20    | <i>MMP2</i>          |                                     |
| 21    | <i>MMP3</i>          |                                     |
| 22    | <i>MMP13</i>         |                                     |
| 23    | <i>MMP9</i>          |                                     |
| 24    | <i>ADAMTS4</i>       |                                     |
| 25    | <i>COL10A1</i>       |                                     |
| 26    | <i>SERPINE1</i>      |                                     |
| 27    | <i>STMN2</i>         |                                     |
| 28    | <i>TIMP1</i>         |                                     |

|    |                     |                           |
|----|---------------------|---------------------------|
| 29 | <i>TIMP2</i>        |                           |
| 30 | <i>TIMP3</i>        |                           |
| 31 | <i>PTGS2</i>        |                           |
| 32 | <i>PPAR-γ</i>       | Adipogenesis              |
| 33 | <i>FABP4</i>        |                           |
| 34 | <i>CXCL12</i>       | Cellular interactions     |
| 35 | <i>VEGFA</i>        | growth factors/receptors  |
| 36 | <i>Thy1 (CD90)</i>  |                           |
| 37 | <i>VEGFC</i>        |                           |
| 38 | <i>(CD73)/NT5E</i>  |                           |
| 39 | <i>PDGFRB</i>       |                           |
| 40 | <i>EGFR</i>         |                           |
| 41 | <i>TGFR2</i>        |                           |
| 42 | <i>FGFR1</i>        |                           |
| 43 | <i>FGFR2</i>        |                           |
| 44 | <i>PTPRC (CD45)</i> |                           |
| 45 | <i>P21</i>          | senescence and cell cycle |
| 46 | <i>P53</i>          |                           |
| 47 | <i>P16</i>          |                           |
| 48 | <i>HPRT1</i>        | Control                   |

**Supplementary Table S2. VEGF release data from *n* = 3 BMSC donors.**

| Age | Gender | VEGF levels (pg/mL) |
|-----|--------|---------------------|
| 52  | Female | 146.97              |
| 45  | Male   | 148.73              |
| 41  | Female | 99.48               |
